# Supplementary material
Source: PubMed Central journal article supplement (PMC3706631)
Supplement: NIHMS458046-supplement-Supplemental_File.pdf [file NIHMS458046-supplement-Supplemental_File.pdf]

Supplemental Tables

Supplemental Table 1: Demographic Factors for 266 positive HPV infections (HPV 16, 18, 31, 33, 35, 52) included in the qPCR analysis of viral load.

| Demographic Factors                                       | Baseline |              |              | 24 months |              |              |
|-----------------------------------------------------------|----------|--------------|--------------|-----------|--------------|--------------|
|                                                           | Control  | Intervention | Chi-2        | Control   | Intervention | Chi-2        |
| <b>Age</b>                                                |          |              |              |           |              |              |
| 18-24                                                     | 27       | 33           | 0.979        | 20        | 0            | <b>0.02</b>  |
| 25-29                                                     | 33       | 45           |              | 20        | 11           |              |
| 30-35                                                     | 22       | 28           |              | 22        | 7            |              |
| >35                                                       | 18       | 21           |              | 12        | 7            |              |
| <b>Marital Status</b>                                     |          |              |              |           |              |              |
| Not married                                               | 0        | 0            |              | 4         | 0            | 0.235        |
| Married                                                   | 100      | 127          |              | 70        | 25           |              |
| <b>Number sex partners in last year</b>                   |          |              |              |           |              |              |
| 1                                                         | 43       | 59           | 0.124        | 38        | 10           | 0.191        |
| 2+                                                        | 57       | 68           |              | 36        | 15           |              |
| <b>Condom use with current sex partner</b>                |          |              |              |           |              |              |
| Currently using                                           | 13       | 11           | 0.548        | 16        | 4            | 0.597        |
| Not using                                                 | 58       | 75           |              | 30        | 13           |              |
| No current sex partner                                    | 29       | 41           |              | 28        | 8            |              |
| <b>Wash genitals after intercourse</b>                    |          |              |              |           |              |              |
| Wash                                                      | .        | .            |              | 61        | 25           | <b>0.025</b> |
| Don't wash                                                | .        | .            |              | 13        | 0            |              |
| <b>Number of times had intercourse in the past 7 days</b> |          |              |              |           |              |              |
| 0                                                         | 7        | 27           | <b>0.003</b> | 21        | 3            | 0.38         |
| 1                                                         | 24       | 16           |              | 10        | 3            |              |
| 2-4                                                       | 62       | 69           |              | 38        | 17           |              |
| 5 or more                                                 | 7        | 15           |              | 5         | 2            |              |

Supplemental Table 2: Number of HPV-positive infections detected for each of the 36 Linear Array Genotypes in men tested at Baseline (N=972) and 24 months (888)

| Genotype | N infections at Baseline<br>(% of total baseline infections) | N infections at 24 Months<br>(% of total 24 month infections) |
|----------|--------------------------------------------------------------|---------------------------------------------------------------|
| 6        | 71 (5.4)                                                     | 18 (3.2)                                                      |
| 11       | 71 (5.4)                                                     | 9 (1.6)                                                       |
| 16       | 63 (4.8)                                                     | 29 (5.2)                                                      |
| 18       | 34 (2.6)                                                     | 31 (5.5)                                                      |
| 26       | 15(1.1)                                                      | 4 (0.7)                                                       |
| 31       | 41 (3.1)                                                     | 9 (1.6)                                                       |
| 33       | 20 (1.5)                                                     | 9 (1.6)                                                       |
| 35       | 37 (2.8)                                                     | 11 (2.0)                                                      |
| 39       | 33 (2.5)                                                     | 11 (2.0)                                                      |
| 40       | 22 (1.7)                                                     | 12 (2.1)                                                      |
| 42       | 43 (3.3)                                                     | 13 (2.3)                                                      |
| 45       | 45 (3.4)                                                     | 6 (1.1)                                                       |
| 51       | 62 (4.7)                                                     | 22 (3.9)                                                      |
| 52       | 50 (3.8)                                                     | 14 (2.5)                                                      |
| 53       | 35 (2.7)                                                     | 23 (4.1)                                                      |
| 54       | 56 (4.2)                                                     | 23 (4.1)                                                      |
| 55       | 28 (2.1)                                                     | 12 (2.1)                                                      |
| 56       | 19 (1.4)                                                     | 7 (1.3)                                                       |
| 58       | 46 (3.5)                                                     | 20 (3.6)                                                      |
| 59       | 34 (2.6)                                                     | 25 (4.5)                                                      |
| 61       | 47 (3.6)                                                     | 28 (5.0)                                                      |
| 62       | 71 (5.4)                                                     | 37 (6.6)                                                      |
| 64       | 3 (0.2)                                                      | 1 (0.2)                                                       |
| 66       | 32 (2.4)                                                     | 22 (3.9)                                                      |
| 67       | 8 (0.6)                                                      | 7 (1.3)                                                       |
| 68       | 31 (2.4)                                                     | 21 (3.8)                                                      |
| 69       | 12 (0.9)                                                     | 8 (1.4)                                                       |
| 70       | 23 (1.7)                                                     | 8 (1.4)                                                       |
| 71       | 9 (0.7)                                                      | 6 (1.1)                                                       |
| 72       | 2 (0.2)                                                      | 6 (1.1)                                                       |
| 73       | 38 (2.9)                                                     | 15 (2.7)                                                      |
| 81       | 32 (2.4)                                                     | 16 (2.9)                                                      |
| 82       | 43 (3.3)                                                     | 6 (1.1)                                                       |
| 83       | 42 (3.2)                                                     | 32 (5.7)                                                      |
| 84       | 53 (4.0)                                                     | 15 (2.7)                                                      |
| 390      | 5 (0.4)                                                      | 4 (0.7)                                                       |
| 6108     | 43(3.3)                                                      | 20 (3.6)                                                      |
| Total    | 1,319                                                        | 560                                                           |

Supplemental Table 3: Distribution of Linear Array band intensity for all HPV-positive infections (N= 1251) across trial arms at baseline and 24 months.

| LA Band Intensity Distribution |          |              |       |           |              |       |
|--------------------------------|----------|--------------|-------|-----------|--------------|-------|
| Intensity                      | Baseline |              |       | 24 months |              |       |
|                                | Control  | Intervention | Total | Control   | Intervention | Total |
| 1 (lowest positive)            | 196      | 205          | 401   | 103       | 59           | 162   |
| 2                              | 150      | 171          | 321   | 89        | 41           | 130   |
| 3                              | 156      | 134          | 290   | 78        | 34           | 112   |
| 4 (highest positive)           | 126      | 181          | 307   | 124       | 32           | 156   |
| Total                          | 628      | 691          | 1,319 | 394       | 166          | 560   |

Supplemental Table 4: Change in Linear Array band intensity for all infections detected both at both baseline and 24 months

| Change in LA band intensity from baseline to 24 months <sup>a</sup> | Control Arm | Intervention Arm | Total |
|---------------------------------------------------------------------|-------------|------------------|-------|
| -3                                                                  | 2           | 1                | 3     |
| -2                                                                  | 7           | 3                | 10    |
| -1                                                                  | 12          | 5                | 17    |
| 0                                                                   | 26          | 11               | 37    |
| 1                                                                   | 18          | 5                | 23    |
| 2                                                                   | 6           | 3                | 9     |
| 3                                                                   | 2           | 0                | 2     |
| Total N                                                             | 73          | 28               | 101   |

Mean band intensity change from baseline to 24 months by trial arm

|                  | Mean Change in Intensity | [95% Conf. Int] | P>  t |
|------------------|--------------------------|-----------------|-------|
| Control arm      | 0.05                     | -0.24 – 0.35    |       |
| Intervention arm | -0.12                    | -0.57 - 0.46    | 0.57  |

<sup>a</sup>Change in intensity = (Band intensity at baseline visit – Band intensity at 24 month visit)
